# Supplementary material for: Graphene quantum dot-modified Co3O4/NiCo2O4 yolk–shell polyhedrons as a polysulfide-adsorptive sulfur host for lithium–sulfur batteries
Source: Royal Society of Chemistry journal article supplement (doi:10.1039/d4cc05879h), 2024-12-30
Supplement: d4cc05879h1.pdf [file d4cc05879h1.pdf]

Electronic Supplementary Information (ESI) for Chemical Communications. This journal  
is (c) The Royal Society of Chemistry 2024.  
Electronic Supplementary Information (ESI)

## **Graphene quantum dots-modified Co<sub>3</sub>O<sub>4</sub>/NiCo<sub>2</sub>O<sub>4</sub> yolk-shell polyhedrons as polysulfides-adsorptive sulfur host for lithium-sulfur batteries**

Jing Xu<sup>a</sup>, Kehao Tao<sup>b</sup>, Yajun Zhu<sup>a,c</sup>, Ting Zhou<sup>a</sup>, Xiaofei Huang<sup>a</sup>, Jinjin Li<sup>b,\*</sup>, Jinyun Liu<sup>a,\*</sup>

### **Experimental**

#### ***Materials***

In this work, Co(NO<sub>3</sub>)<sub>2</sub>·6H<sub>2</sub>O, 2-methylimidazole and sulfur powders were purchased from Aladdin Reagent (Shanghai) Co., Ltd. Methanol and Ni(NO<sub>3</sub>)<sub>2</sub>·6H<sub>2</sub>O were purchased from Sinopharm Chemical Reagent Co., Ltd. Graphene quantum dots (GQDs) aqueous solution (1 mg mL<sup>-1</sup>) was purchased from Suzhou Hengqiu Technology Co., Ltd. All reagents were analytical-grade pure and were used as received without further purification.

#### ***Synthesis of ZIF-67***

First, 1 mmol Co(NO<sub>3</sub>)<sub>2</sub>·6H<sub>2</sub>O and 4 mmol 2-methylimidazole were dissolved in 25 mL methanol to form two solutions. The methanol solution containing 2-methylimidazole was poured into a methanol solution containing Co(NO<sub>3</sub>)<sub>2</sub>·6H<sub>2</sub>O under stirring. After aging at room temperature for 24 h, the purple precipitate was collected by centrifugation, washed with deionized water and ethanol two times, and dried at 70 °C for 6 h.

#### ***Synthesis of Co<sub>3</sub>O<sub>4</sub>/NiCo<sub>2</sub>O<sub>4</sub>***

The 40 mg ZIF-67 was ultrasonically dispersed in 25 mL ethanol solution containing 80 mg Ni(NO<sub>3</sub>)<sub>2</sub>·6H<sub>2</sub>O. After stirring for 30 min, ZIF-67/Ni-Co layered double hydroxide (ZIF-67/Ni-Co LDH) formed, which was collected by centrifugation and washed with deionized water and ethanol, dried at 70 °C overnight, and then the resulting yolk-shell

samples were annealed at 350 °C for 2 h in air at a heating rate of 1 °C min<sup>-1</sup>. For control experiment, pure Co<sub>3</sub>O<sub>4</sub> was also prepared by directly-heating ZIF-67 in air through the same approach.

### ***Synthesis of Co<sub>3</sub>O<sub>4</sub>/NiCo<sub>2</sub>O<sub>4</sub>/GQDs@S***

The Co<sub>3</sub>O<sub>4</sub>/NiCo<sub>2</sub>O<sub>4</sub> polyhedrons (0.1 g) were mixed with 20 mL of GQDs solution and ultrasonicated for 5 min, then the mixture was collected and heated in an oven at 160 °C for 2 h. At last, Co<sub>3</sub>O<sub>4</sub>/NiCo<sub>2</sub>O<sub>4</sub>/GQDs was mixed with sulfur powders at a typical mass ratio of 3:7, sealed in argon gas, and placed in a reactor at 155 °C for 20 h. For comparison, Co<sub>3</sub>O<sub>4</sub>/NiCo<sub>2</sub>O<sub>4</sub>@S without GQDs, and Co<sub>3</sub>O<sub>4</sub>@S were also prepared by the similar method.

### ***Characterization***

The samples were characterized on transmission electron microscopy (TEM, Hitachi HT-7700), scanning electron microscopy (SEM, Hitachi S4800), high-resolution transmission electron microscopy (HRTEM, JEOL JEM-2010), X-ray diffraction (XRD, Rigaku SmartLab) through a Cu K $\alpha$  radiation source, X-ray photoelectron spectroscopy (XPS, Thermo Scientific), and UV-visible spectroscopy (HITACHI, U-2910). Inductively coupled plasma optical emission spectrometer (ICP-OES, Thermo Scientific iCAP PRO) was used to measure the metal content of the sample.

### ***Electrochemical measurements***

The active materials, carbon black and polyvinylidene fluoride binder were uniformly mixed in N-methylpyrrolidone at a ratio of 7:2:1 to prepare a mixed slurry, then the slurry was coated on aluminum foil. The cathode had a typical sulfur loading of about 1.0 mg cm<sup>-2</sup>. The lithium metal was used as the anode with the electrolyte of 1.0 M LiTFSI in a 1:1 (v/v) 1,3-dioxolane/dimethyl ether mixture with 1.0 wt% LiNO<sub>3</sub>. The electrolyte to sulfur ratio used in each battery was about 20  $\mu$ L mg<sup>-1</sup>. Celgard-2400 film was used as separator. Type-2032 coin cells were assembled in a glove box (Mikrona Super 1220/750/900) filled with argon gas. The charge and discharge tests were carried out on a NEWARE battery testing system. Cyclic voltammetry (CV) and electrochemical impedance spectroscopy (EIS) were performed on an electrochemical working station (ChenHua CHI660e).

### ***Adsorption towards polysulfides***

In order to study the adsorption of  $\text{Co}_3\text{O}_4/\text{NiCo}_2\text{O}_4/\text{GQDs}$  towards polysulfides, A  $\text{Li}_2\text{S}_6$  solution was prepared by using S and  $\text{Li}_2\text{S}$  (molar ratio=5:1) in 1, 2-dimethoxy-ethane (50 mL) under stirring for 72 h.  $\text{Co}_3\text{O}_4/\text{NiCo}_2\text{O}_4/\text{GQDs}$  or  $\text{Co}_3\text{O}_4$  was put into 3 mL  $\text{Li}_2\text{S}_6$  solution for adsorption. After overnight, the adsorbed solution was measured by using UV-vis spectroscopy (LAMBDA 850). All adsorption processes were carried out in glove box. In addition, initial  $\text{Li}_2\text{S}_6$  solution was measured on UV-vis spectroscopy for comparison.

### Theoretical calculations

First-principle calculations were performed in a Materials Studio software, setting 500 eV as the cutoff energy. The adsorption energies towards the polysulfide ( $\text{Li}_2\text{S}_4$ ,  $\text{Li}_2\text{S}_6$ ,  $\text{Li}_2\text{S}_8$ ) on hosts were obtained by the following relation:  $E_{ads} = E_{sub+S} - E_S - E_{sub}$ , where the  $E_{sub+S}$ , where  $E_S$  and  $E_{sub}$  were the calculated energies of polysulfide–host, polysulfide, and host, respectively.

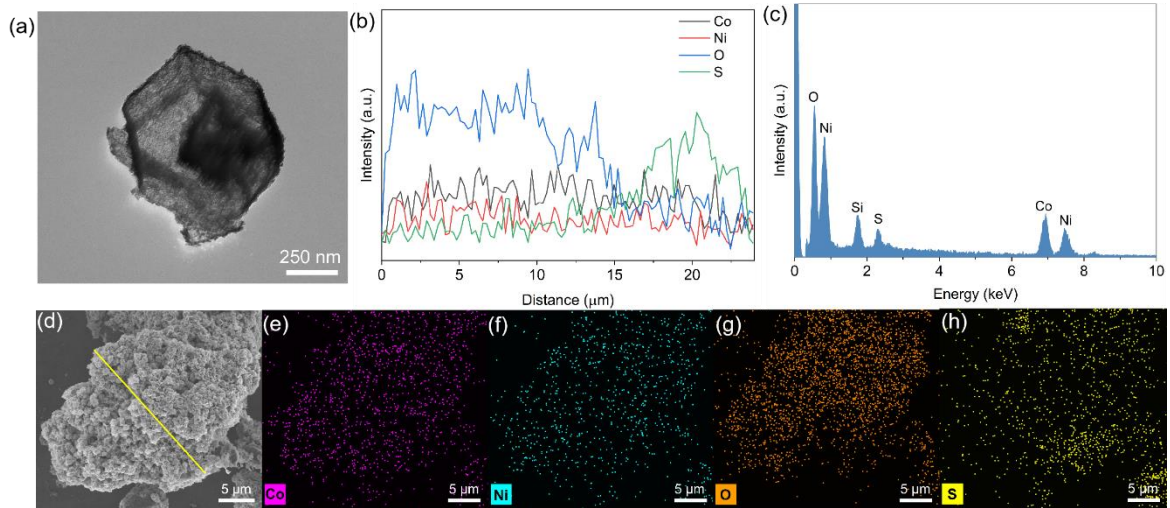

**Fig. S1** (a) TEM image of  $\text{Co}_3\text{O}_4/\text{NiCo}_2\text{O}_4/\text{GQDs}$ . (b) Line-scanning curves and (c) EDS spectrum of  $\text{Co}_3\text{O}_4/\text{NiCo}_2\text{O}_4/\text{GQDs}@S$ . (d) SEM and (e-h) elemental mapping images of  $\text{Co}_3\text{O}_4/\text{NiCo}_2\text{O}_4/\text{GQDs}@S$ .

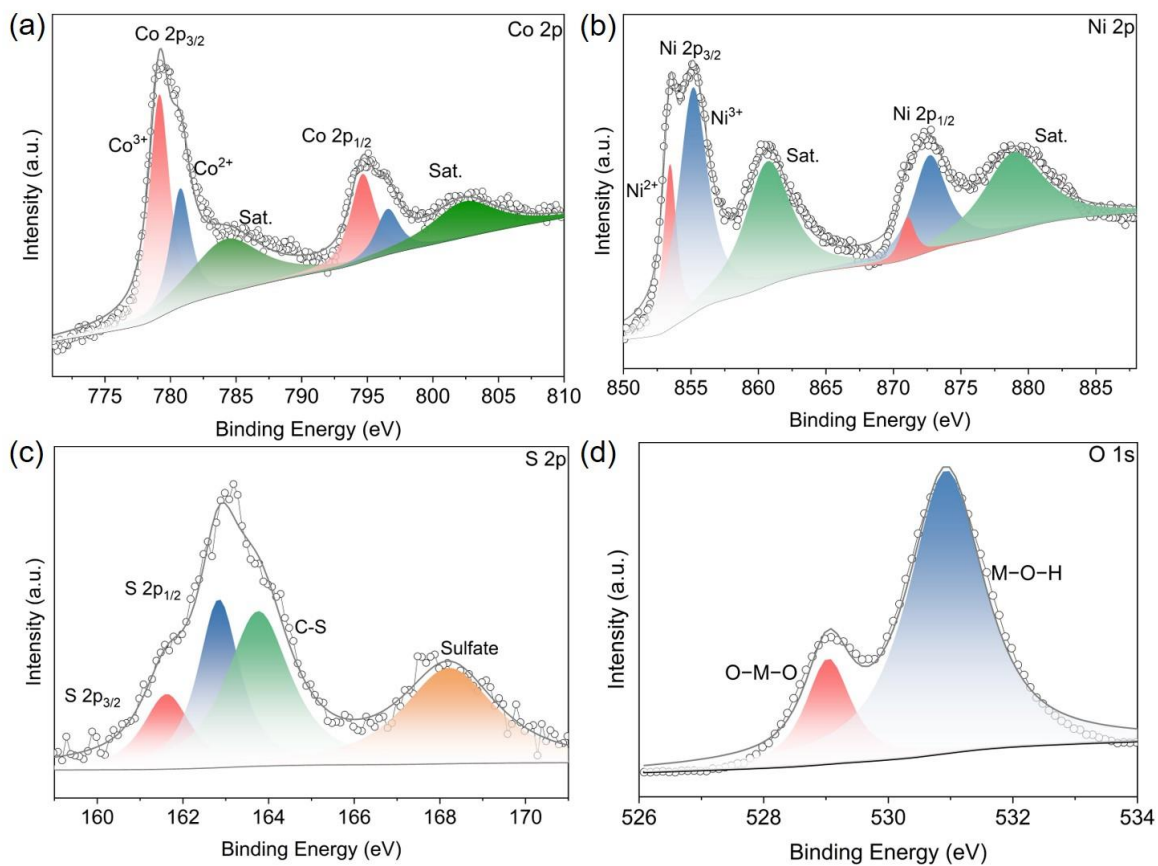

**Fig. S2** XPS spectra of  $\text{Co}_3\text{O}_4/\text{NiCo}_2\text{O}_4/\text{GQDs}@S$ : (a) Co 2p, (b) Ni 2p, (c) S 2p, (d) O 1s.

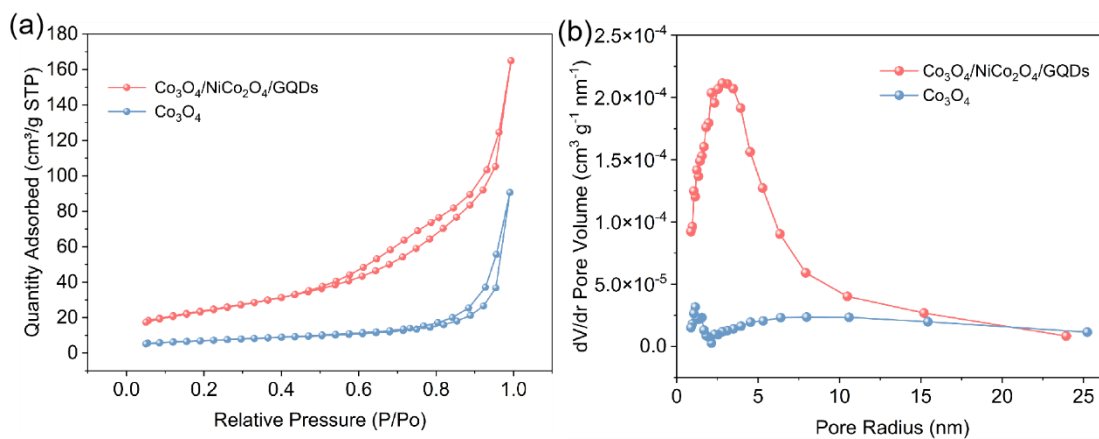

**Fig. S3** (a)  $\text{N}_2$  adsorption–desorption isotherms. (b) Pore-size distribution.

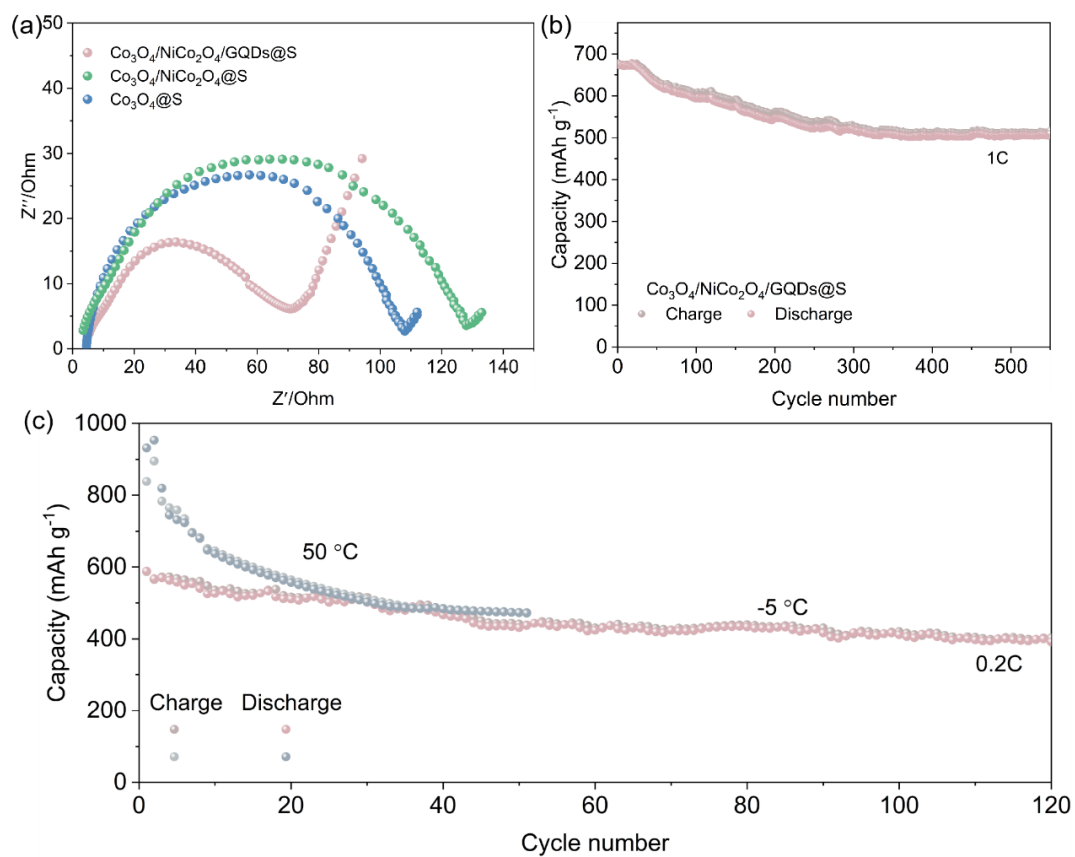

**Fig. S4** (a) EIS spectra of  $\text{Co}_3\text{O}_4/\text{NiCo}_2\text{O}_4/\text{GQDs}@S$ ,  $\text{Co}_3\text{O}_4/\text{NiCo}_2\text{O}_4@S$  and  $\text{Co}_3\text{O}_4@S$  after 100 cycles at 0.2 C. (b) Long-term cycle performance of  $\text{Co}_3\text{O}_4/\text{NiCo}_2\text{O}_4/\text{GQDs}@S$  at 1C. (c) Cycling properties under  $-5\text{ }^\circ\text{C}$  and  $50\text{ }^\circ\text{C}$ .

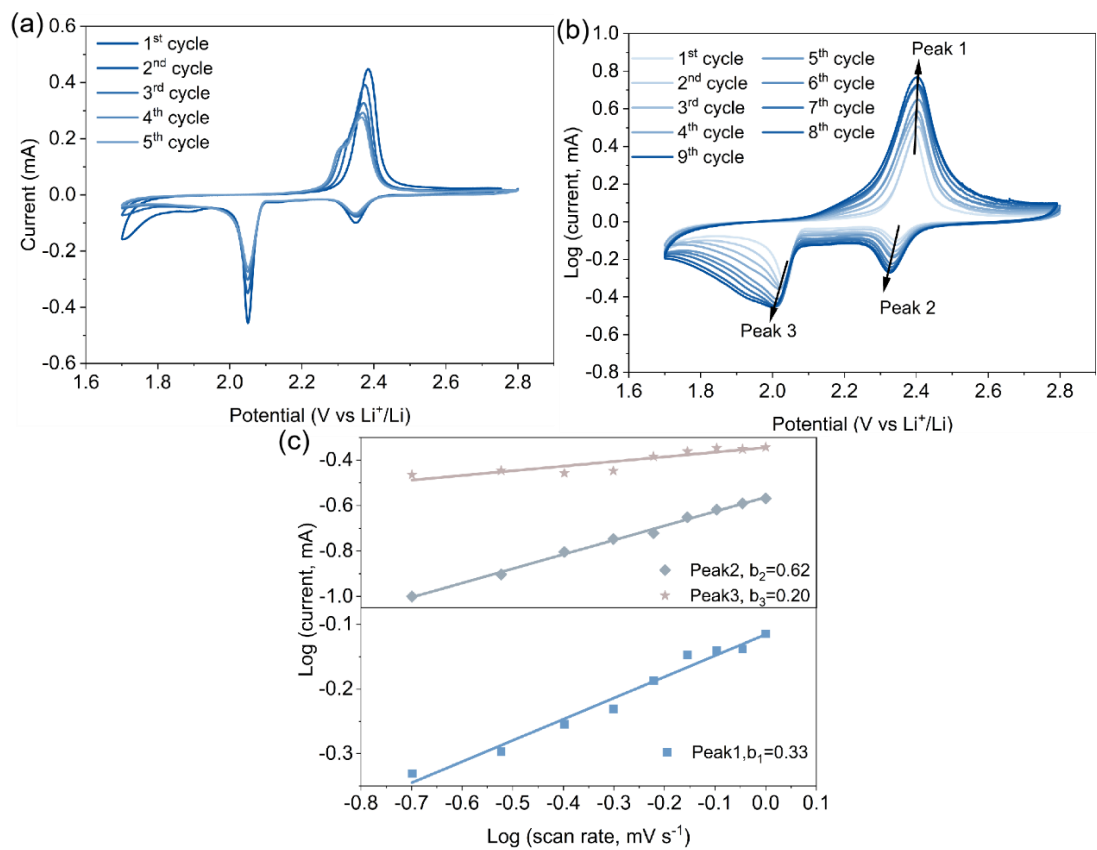

**Fig. S5** (a) CV plots of Co<sub>3</sub>O<sub>4</sub>@S in the initial five cycles at 0.1 mV s<sup>-1</sup>. (b) CV curves of Co<sub>3</sub>O<sub>4</sub>@S in the range of 0.1-1 mV s<sup>-1</sup>. (c) Relationships between log(*i*) and log(*v*).

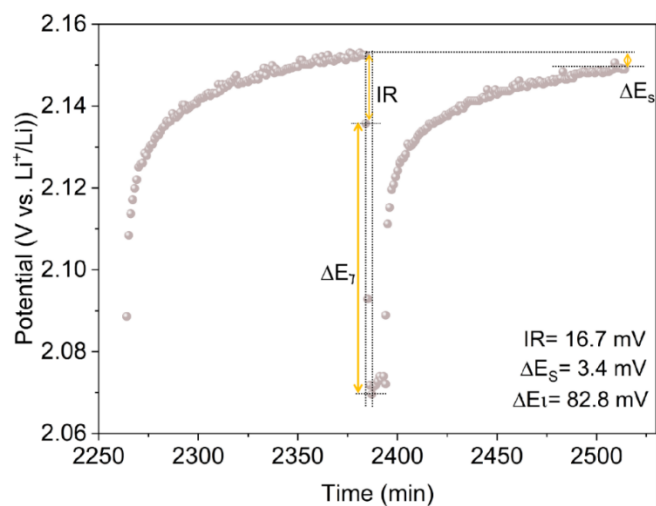

**Fig. S6** IR drop of Co<sub>3</sub>O<sub>4</sub>@S.

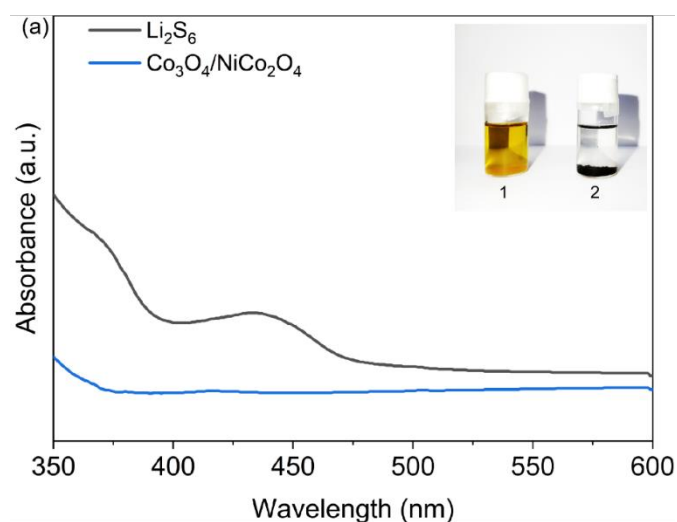

**Fig. S7** UV-vis spectra of the  $\text{Li}_2\text{S}_6$  solution before and after adsorption by  $\text{Co}_3\text{O}_4/\text{NiCo}_2\text{O}_4/\text{GQDs}$ . Inset shows the photos:  $\text{Li}_2\text{S}_6$  solution (1) before and (2) after adsorption.

**Table S1.** Comparison on electrochemical performance of some hollow host-based sulfur cathodes.

| Cathode                                                              | Cycling rate | Cycle number | Capacity ( $\text{mAh g}^{-1}$ ) | References |
|----------------------------------------------------------------------|--------------|--------------|----------------------------------|------------|
| $\text{NiO-NiCo}_2\text{O}_4@\text{PPy}$<br>hollow polyhedrons       | 1 C          | 200          | 411                              | [1]        |
| $\text{MnO}_2@\text{carbon hollow nanoboxes}$                        | 2 A/g        | 200          | ~200                             | [2]        |
| $\text{CoO/SnO}_2@\text{NC/S}$                                       | 0.2 C        | 100          | 327                              | [3]        |
| $\text{NiCo}_2\text{O}_4$ hollow<br>nanoflowers                      | 0.5 C        | 100          | 610                              | [4]        |
| $\text{Co}_3\text{O}_4/\text{S}/\text{carbon nanotubes}$             | 0.5 C        | 550          | 496                              | [5]        |
| $\text{Co}_3\text{O}_4/\text{NiCo}_2\text{O}_4/\text{GQDs}@\text{S}$ | 0.2 C        | 100          | 727                              | This work  |
|                                                                      | 1 C          | 600          | 508                              |            |

## References

- [1] F. B. Xu, B. Jin, H. Li, W. T. Ju, Z. Wen and Q. Jiang, *New J. Chem.*, 2019, **43**, 18294.
- [2] S. Rehman, T. Y. Tang, Z. Ali, X. X. Huang and Y. L. Hou, *Small*, 2017, **13**, 1700087.
- [3] M. T. Duan, M. R. Wu, K. Xue, Z. X. Bian, J. Shi, X. M. Guo, F. Cao, J. H. Zhang, Q. H. Kong and F. Zhang, *Int. J. Min. Met. Mater.*, 2021, **28**, 1647-1655.
- [4] Z. Cui, S. A. He, Q. Liu and R. J. Zou, *Dalton*, 2020, **49**, 6876-6883.
- [5] J. X. Wang, C. Wang and M. M. Zhen, *Chem. Eng. J.*, 2019, **356**, 1-10.
